# Supplementary material for: Cell competition corrects noisy Wnt morphogen gradients to achieve robust patterning in the zebrafish embryo
Source: PubMed Central journal article supplement (PMC6797755; doi:10.1038/s41467-019-12609-4), 2019-10-17
Supplement: 41467_2019_12609_MOESM1_ESM.pdf [file 41467_2019_12609_MOESM1_ESM.pdf]

**Cell competition corrects noisy Wnt morphogen gradients to  
achieve robust patterning in the zebrafish embryo**

*Akieda et al.*

**Supplementary information:**

**Supplementary Figs. 1–8 and legends**

**Supplementary references**

# Supplementary Fig. 1 Related to Fig. 1

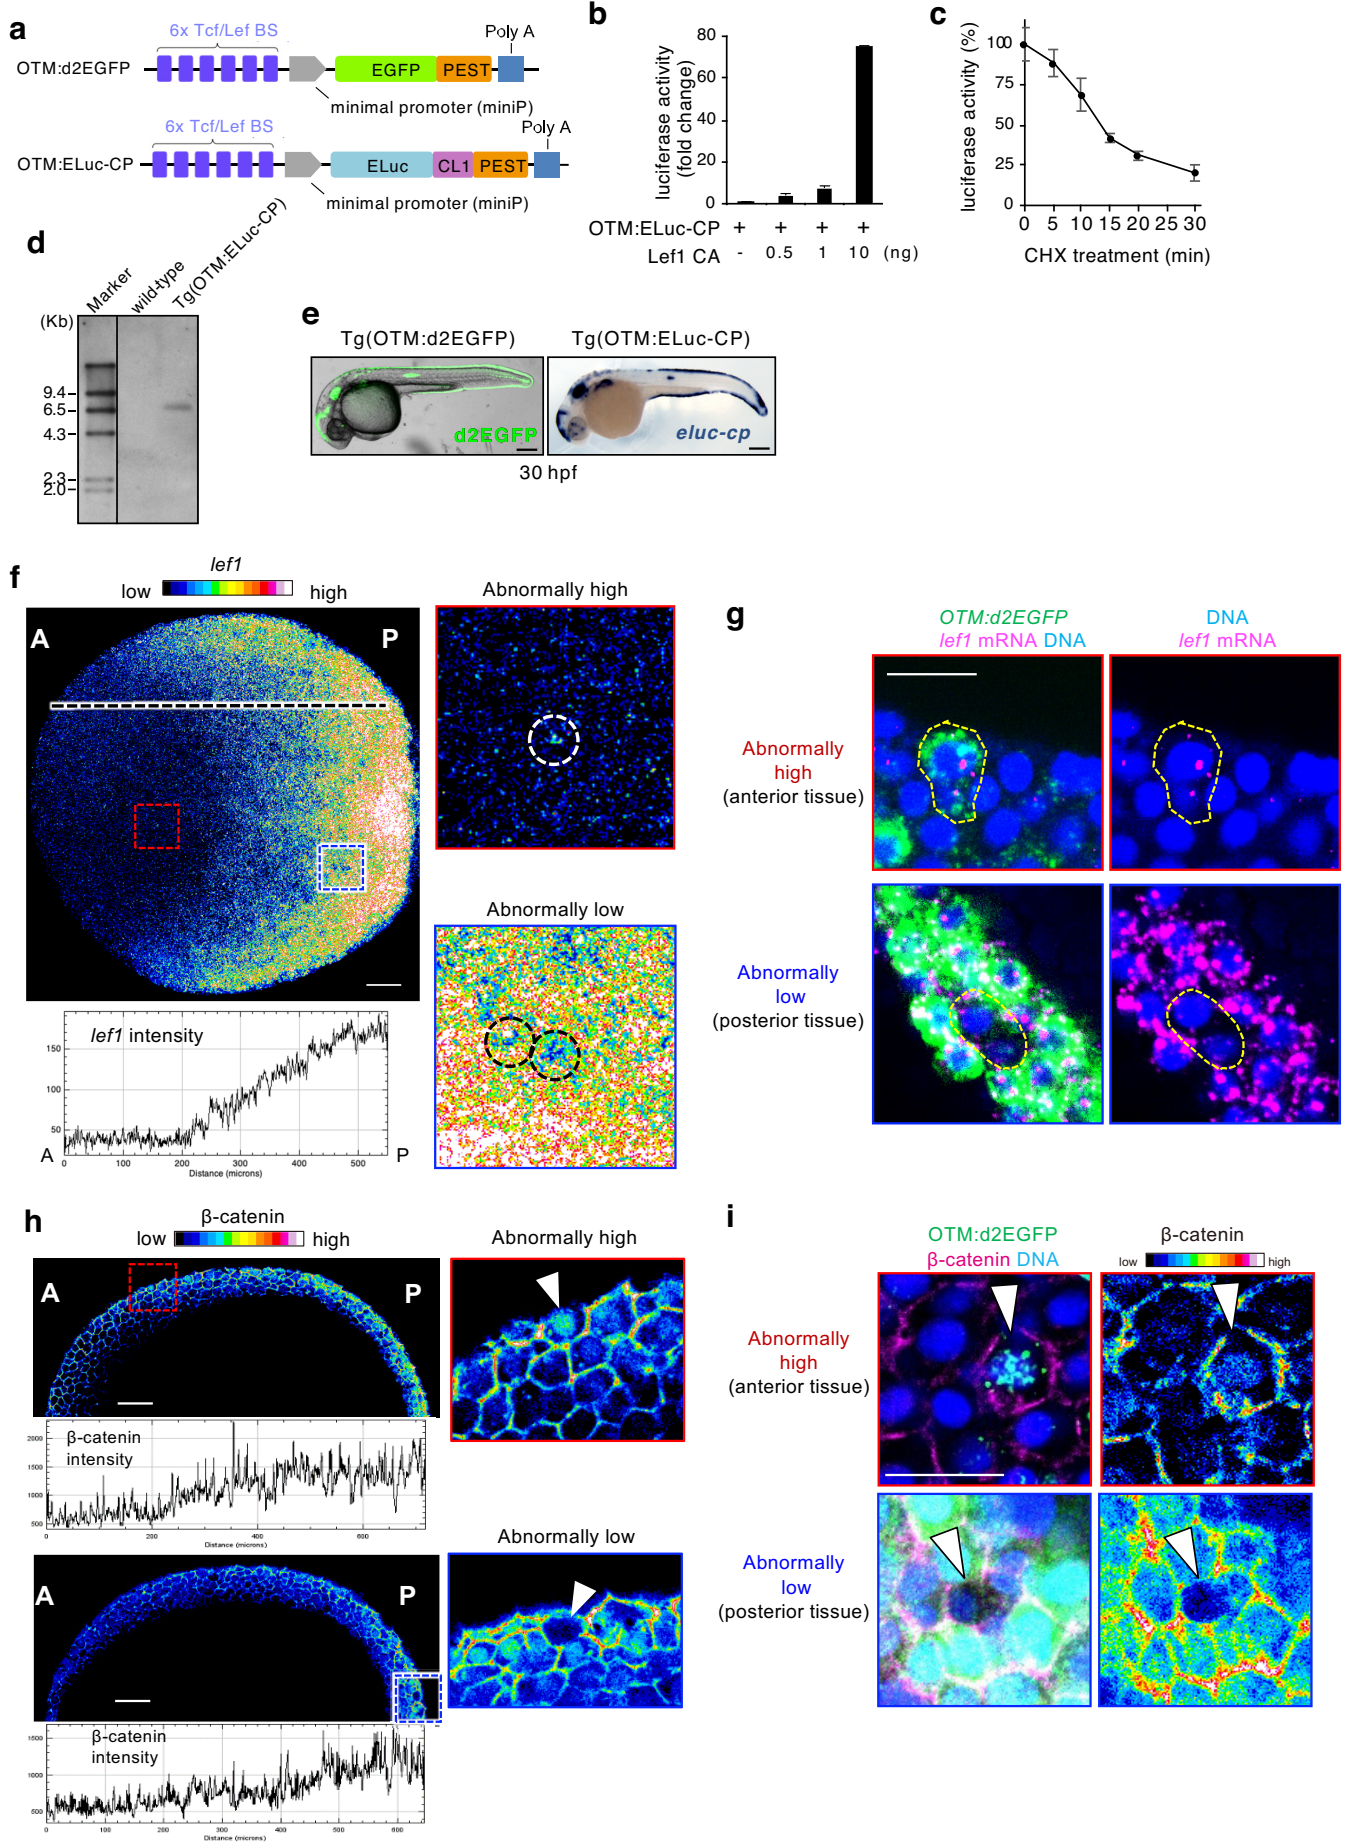

**Supplementary Fig. 1** Wnt/ $\beta$ -catenin signalling reporter properties. Related to Fig. 1. **a** Schematic diagrams of two Wnt/ $\beta$ -catenin signalling-reporter constructs: OTM:d2EGFP and OTM:ELuc-CP. Tcf/Lef BS: consensus sequence of the Tcf/Lef-binding site; EGFP: enhanced green fluorescent protein; ELuc: Emerald Luciferase; PEST: degradation sequence derived from mouse ornithine decarboxylase; CL1: degradation sequence derived from yeast; Poly A: SV40 polyadenylation sequence. **b** OTM:ELuc-CP drives ELuc-CP expression in mouse neuro-2a cells in response to the activation of Wnt/ $\beta$ -catenin signalling. Neuro-2a cells were transfected using a reporter construct with a titrated amount of an expression plasmid-encoding Lef1 CA. Then, luciferase activity was measured. **c** The half-life of ELuc-CP is approximately 15 min. Neuro-2a cells were transfected using a reporter construct. After 36 hours, cells were treated with 100 ng/ml cycloheximide (CHX) for the indicated times. Then, luciferase activity was measured. The error bars indicate the standard deviations. **d** The OTM:ELuc-CP-transgenic zebrafish line carries a single copy of the OTM:ELuc-CP reporter. Southern blot analysis of the transgenes in the OTM:ELuc-CP transgenic zebrafish line. Genomic DNA was prepared from the tail fins of this line and used for Southern blot analysis. **e** OTM:ELuc-CP and OTM:d2EGFP are activated in same areas of zebrafish embryos. Left panel shows d2EGFP fluorescence (green) merged with bright-field of OTM:d2EGFP-transgenic zebrafish at 30 hpf (left view with the anterior side to the left). Right panel shows whole mount *in situ* hybridization of *eluc-cp* (blue) in OTM:ELuc-CP-transgenic zebrafish at 30 hpf (left view with the anterior side to the left). Scale bar, 200  $\mu$ m. **f, g** Expression gradient of a Wnt/ $\beta$ -catenin-target gene *lefl* is noisy during zebrafish AP axis formation and *lefl* expression-noise correlates with OTM:d2EGFP reporter-noise. Confocal images showing whole-mount fluorescence *in situ* hybridization with *lefl* and *gfp* mRNA of wild-type (**f**) or OTM:d2EGFP (**g**) embryos. **f** Panels show fluorescence intensity and the magnified views of the noise areas. Scale bar, 20  $\mu$ m. Left bottom graph shows *lefl* mRNA levels in the area indicated in left top panel dot line. **g** Naturally generated unfit Wnt/ $\beta$ -catenin cells (unfit cells with abnormally high or low OTM:d2EGFP activity) are enclosed with yellow dotted line circles. **h, i** Gradient of endogenous nuclear  $\beta$ -catenin protein levels is noisy during zebrafish AP axis formation and nuclear  $\beta$ -catenin-noise correlates with OTM:d2EGFP reporter-noise. Confocal images showing whole-mount immunostaining of  $\beta$ -catenin in wild-type (**h**) or OTM:d2EGFP (**i**) embryos. **h** Panels show fluorescence intensity and the magnified views of the noise areas. Scale bar, 20  $\mu$ m. Graph shows  $\beta$ -catenin protein levels in the area indicated in left top panel dotted line. **i** Naturally generated unfit Wnt/ $\beta$ -catenin cells (unfit cells with abnormally high or low OTM:d2EGFP activity) are indicated with arrow heads.

# Supplementary Fig. 2 Related to Fig. 1

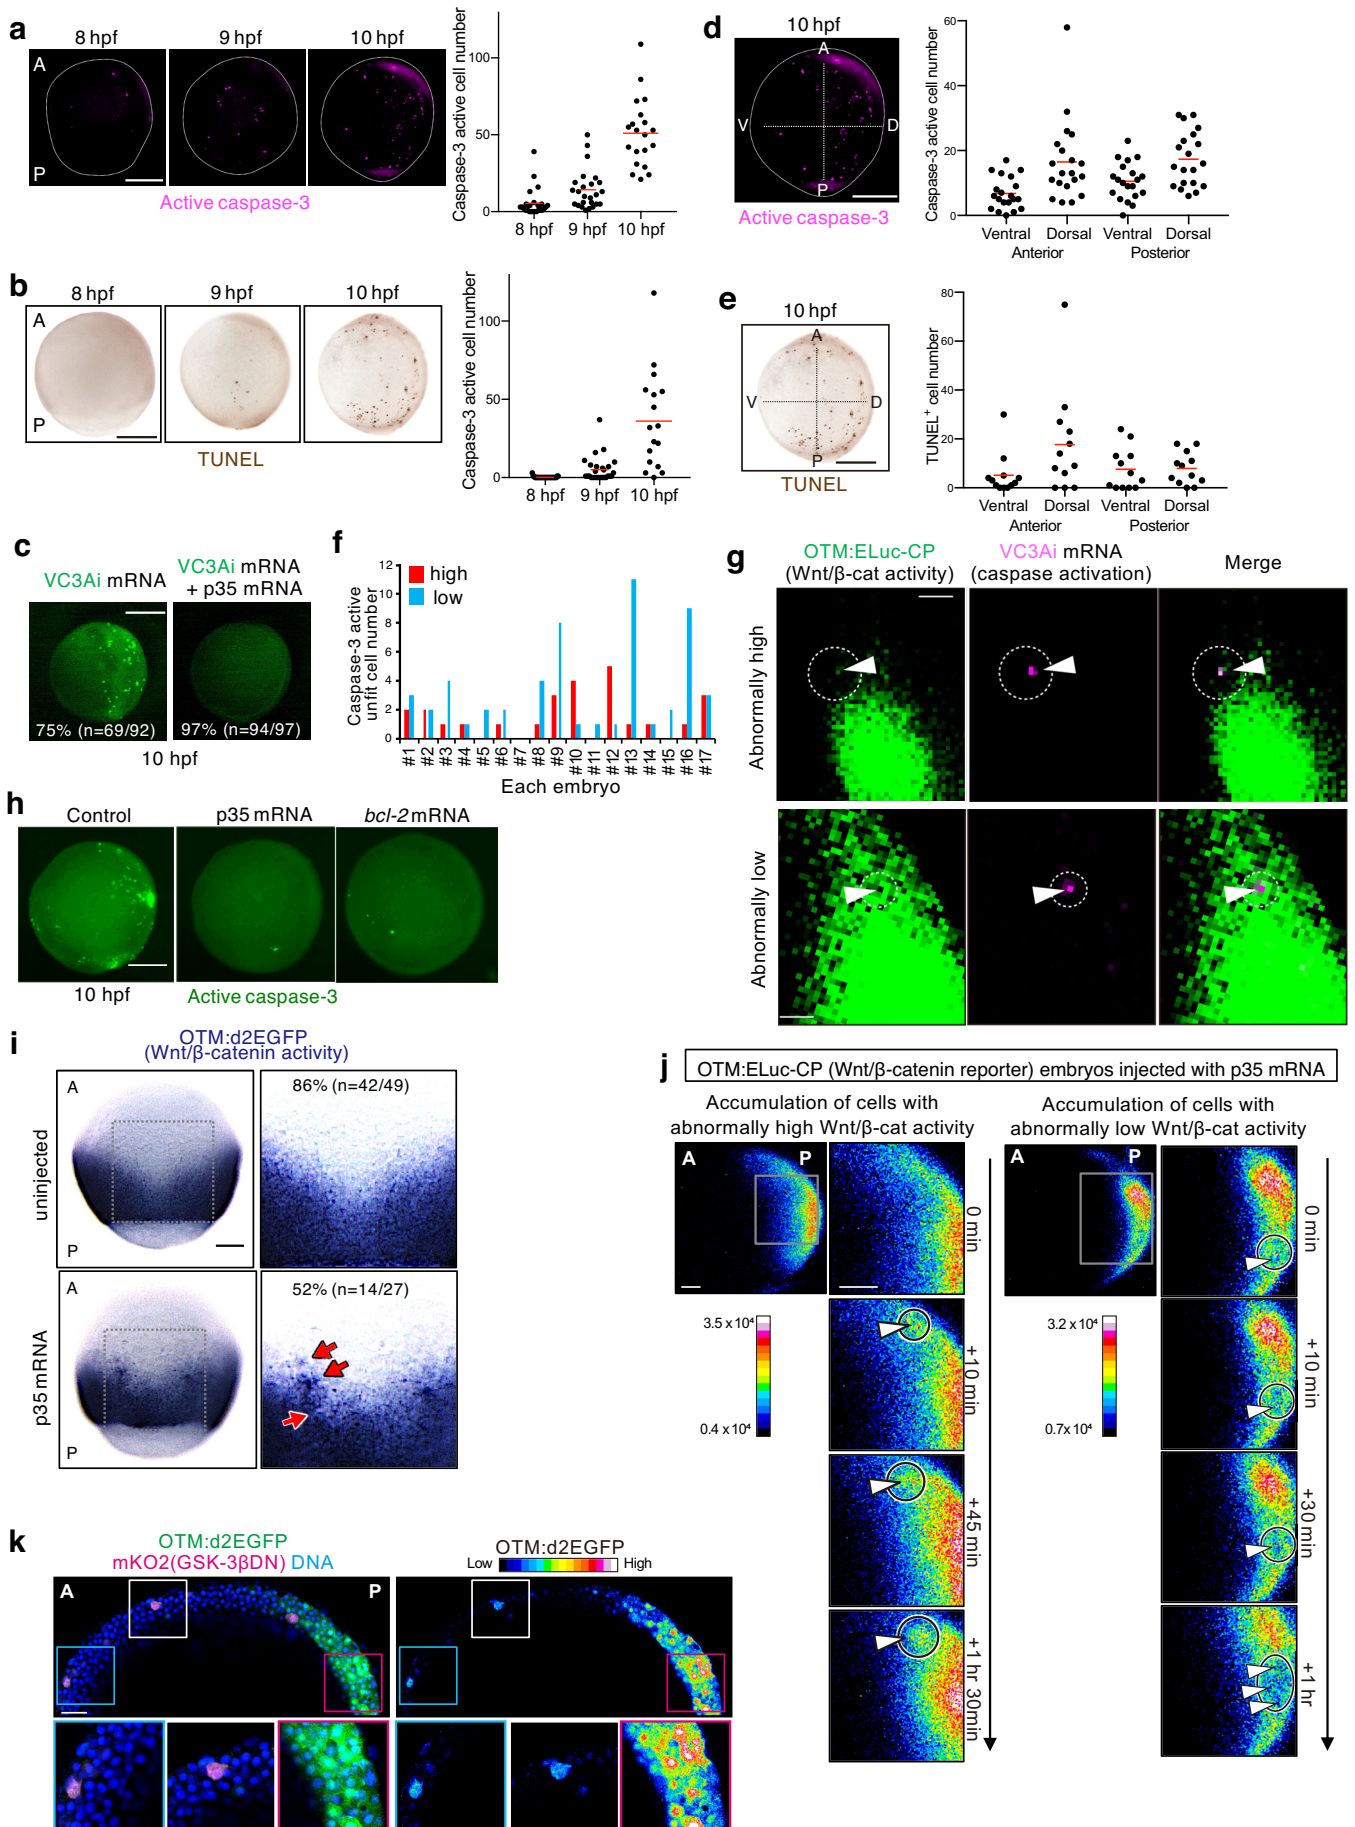

**Supplementary Fig. 2** Physiological apoptosis during zebrafish AP axis formation. Related to Fig. 1. **a** Caspase-3 activation during zebrafish AP axis formation. Representative fluorescence images showing whole-mount immunostaining of active caspase-3 (magenta) in embryos maintained with normal conditions. White dotted line indicates outline of the embryo (lateral view with the anterior to the top, ventral to the left). Numbers of caspase-3-active cells in each embryo are graphed. Each dot represents one embryo (8 hpf, n = 27 embryos; 9 hpf, n = 25; 10 hpf, n = 20). Means are indicated by a horizontal bar. Scale bar, 200  $\mu$ m. **b** Cell death during zebrafish AP axis formation. Same analysis as in (A) with TUNEL assay (8 hpf, n = 29 embryos; 9 hpf, n = 27; 10 hpf, n = 17). **c** Live imaging of caspase-3 activation in zebrafish embryos. Representative fluorescence images show an embryo injected with mRNA of the caspase activity fluorescent biosensor/VC3Ai<sup>78</sup> (250 pg) (green), or co-injected with the caspase inhibitor p35 (800 pg) (lateral with the anterior to the top, ventral to the left). Co-injection of p35 mRNA effectively reduced VC3Ai fluorescence, suggesting that the fluorescence in VC3Ai-injected embryos shows the activation of caspase. Scale bar, 200  $\mu$ m. (See also Supplementary Movie 2). **d** Caspase-3 active cells appear in an irregular manner. Representative fluorescence images showing whole-mount immunostaining of active caspase-3 (magenta) in embryos maintained with normal conditions at the 10 hpf stage (lateral view with the anterior to the top, ventral to the left). A, P, V, and D indicate anterior, posterior, ventral, and dorsal, respectively. Scale bar, 200  $\mu$ m. The numbers of caspase-3-active cells in each embryo are graphed. Each dot represents one embryo (n = 20 embryos). The number of caspase-3-active cells/per embryos and the position of these cells were irregular. **e** Same analysis as in (d) with TUNEL assay (n = 17 embryos). **f** Number of naturally generated unfit Wnt/ $\beta$ -catenin cells with active caspase-3 in each embryo at 8.5–9 hpf. **g** Caspase activation in naturally generated unfit cells. Representative images of OTM:ELuc-CP embryos injected with VC3Ai mRNA (magenta). OTM:ELuc-CP reporter (green) visualizes Wnt/ $\beta$ -catenin signalling activity. Arrows indicate naturally generated unfit Wnt/ $\beta$ -catenin cells with active caspase. Scale bar, 50  $\mu$ m. **h** Overexpression of *bcl-2* or *p35* efficiently reduces physiologically occurring apoptosis. Representative fluorescence images showing whole-mount immunostaining of active caspase-3 (green) in embryos uninjected or injected with *bcl-2* or *p35* mRNA. Scale bar, 200  $\mu$ m. **i** Apoptosis inhibition distorts the Wnt/ $\beta$ -catenin-gradient. Whole-mount in situ hybridization of d2EGFP in Tg(OTM:d2EGFP) embryos (dorsal view) uninjected or injected with p35 mRNA (800 ng). Magnified image of boxed area (black line; right). Embryo percentages and numbers with similar expression patterns are shown. Red arrows: ectopic activation or inactivation areas. Scale bar, 200  $\mu$ m.  $p < 0.01$  for p35 mRNA versus control (Fisher's exact test). **j** Blocking of apoptosis induces accumulation of unfit Wnt/ $\beta$ -catenin cells. Time lapse images showing that unfit Wnt/ $\beta$ -catenin cells gradually accumulate in p35 mRNA-injected OTM:ELuc-CP embryos. Scale bars, 100  $\mu$ m. Pixel area length is 6.5  $\mu$ m,  $\leq$  zebrafish deep cell diameter ( $\sim 10$   $\mu$ m). **k** The levels of GSK3 $\beta$ DN-induced OTM:d2EGFP activation in the anterior tissue were similar to those of the physiological activation in the posterior tissue. Optical sagittal cross-section (dorsal side) in 8.3 hpf OTM:d2EGFP-transgenic embryos mosaically introduced with cells expressing membrane mKO2 with GSK3 $\beta$ DN. Left panels show fluorescence of mKO2 (magenta), OTM:d2EGFP (green), and DNA (blue). Right panels show fluorescence intensity of OTM:d2EGFP. Bottom panels show the magnified views. Scale bar, 50  $\mu$ m.

# Supplementary Fig. 3 Related to Fig. 2

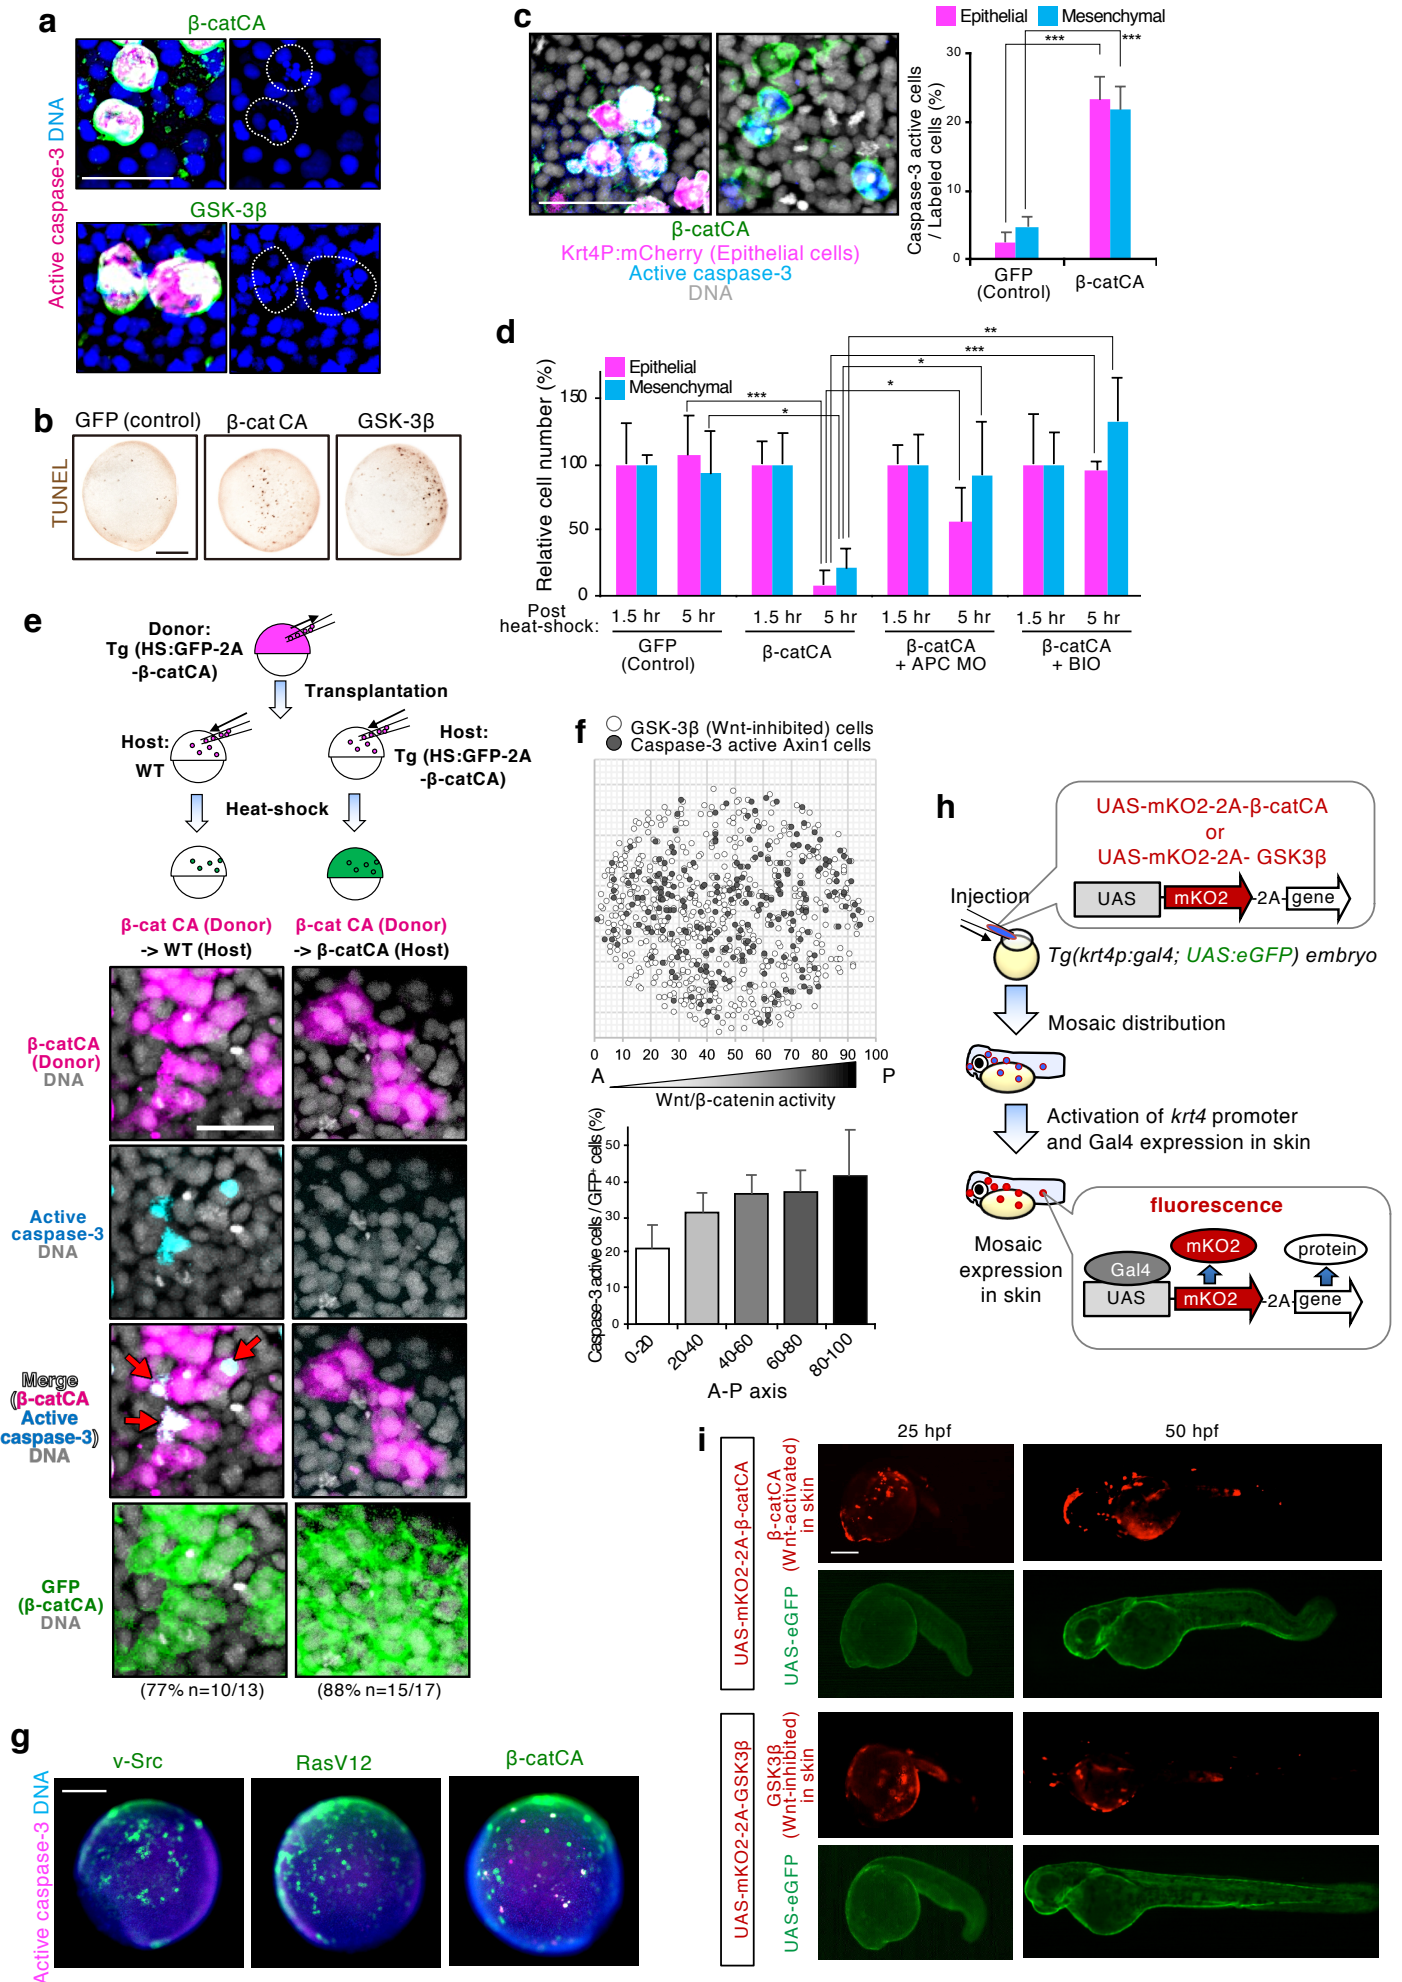

**Supplementary Fig. 3** Wnt/ $\beta$ -catenin activity-abnormal cells require their neighbouring normal cells to undergo apoptosis. Related to Fig. 3. **a** DNA fragmentation occurs in caspase-3-active  $\beta$ -catCA-overexpressing cells or GSK-3 $\beta$ -overexpressing cells. Representative confocal fluorescence images show GFP (green), active caspase-3 (magenta), and DNA (blue) in embryos. Scale bar, 20  $\mu$ m. **b** DNA fragmentation confirmed by TUNEL assay. Scale bar, 200  $\mu$ m. **c** Apoptosis of  $\beta$ -catCA-overexpressing cells (cells with abnormally high Wnt activity) occurs both in epithelial cells (GFP<sup>+</sup>mCherry<sup>+</sup>) and mesenchymal cells (GFP<sup>+</sup>mCherry<sup>-</sup>). Embryos were co-injected with an GFP- or  $\beta$ -catCA (green)-expression plasmid (hsp70l:GFP or hsp70l:GFP-T2A- $\beta$ -catCA) and Krt4P:mCherry plasmid, which expresses mCherry (magenta) in epithelia. mCherry<sup>+</sup> cells located in the epithelia, whereas mCherry<sup>-</sup> cells are mesenchymal cells. Confocal images showing whole-mount immunostaining of active caspase-3 (blue) in the plasmid-injected embryos. Graph shows the means  $\pm$  SEM (n=8 or 9 embryos, two independent experiments) of GFP<sup>+</sup> caspase-3 active cell frequencies. Scale bar, 50  $\mu$ m. **d**  $\beta$ -catCA-overexpressing cells are eliminated from embryos, whereas upregulation of Wnt/ $\beta$ -catenin activity in whole embryos blocks cell elimination. Percentages of relative GFP<sup>+</sup> cell numbers at 1.5 to 5 h post heat-shock in APC MO-injected or 10  $\mu$ M BIO-treated embryos are shown. (n=4 or 5 embryos, two or more independent experiments) \*\*\* $p < 0.001$ , \*\* $p < 0.01$  \* $p < 0.05$  ( $t$  test). **e** Transplantation of a small number of  $\beta$ -catCA-expressing cells into normal embryonic tissue activates caspase-3 in the transplanted cells in contact with normal cells. Schematic illustration of the experimental design for cell transplantation. Rhodamine-dextran-labelled donor cells from Tg(hsp70l:GFP-T2A- $\beta$ -catCA) embryos were transplanted into unlabelled wild-type or Tg(hsp70l:GFP-T2A- $\beta$ -catCA) host embryos. Representative confocal fluorescence images show donor cells (magenta), DNA (grey), active caspase-3 (cyan), and GFP/transgene carrier (green) in transplanted embryos. The percentages of embryos showing similar phenotype and number of embryos are shown under each image. Scale bar, 50  $\mu$ m. **f** Cells causing excess noise in Wnt/ $\beta$ -catenin-gradients efficiently undergo apoptosis. Top panels show the maps of artificially introduced cells in zebrafish embryos. Bottom graphs show the means  $\pm$  SEM of caspase-3-active cell frequencies within the divided range along the AP axis (GSK-3 $\beta$ , n = 7 embryos, 1062 cells). **g** Signalling-abnormal cells expressing v-Src or RasV12 do not undergo apoptosis. Representative fluorescence images show whole mount immunostaining of GFP (green), active caspase-3 (magenta), and DNA (blue) in embryos mosaically introduced with cells expressing v-Src or RasV12. Scale bar, 200  $\mu$ m. **h, i** Schematic illustration of experimental introduction of Wnt/ $\beta$ -catenin-abnormal cells in zebrafish larval skin. **h** Plasmids that express both membrane-tagged mKO2 and a Wnt/ $\beta$ -catenin-regulator gene in response to Gal4-mediated UAS promoter activation were injected into one-cell stage Tg(*krt4p:gal4*; UAS:*eGFP*) zebrafish embryos (gifts from Drs. K. Kawakami and H. Wada)<sup>1</sup>. Cell division during development promotes mosaic distribution of injected plasmids. *Keratin4* (*Krt4*) promoter activates Gal4 expression in larval skin (keratinocytes). Consequently, keratinocytes with the plasmid express both mKO2 and the Wnt modulator gene, resulting in the appearance of a small number of mKO2<sup>+</sup> Wnt/ $\beta$ -catenin-abnormal cells. UAS:*eGFP* is also activated in larval skin. **i** Fluorescence images show embryos artificially introduced with keratinocytes overexpressing  $\beta$ -catCA (Wnt/ $\beta$ -catenin activator) or GSK3 $\beta$  (Wnt/ $\beta$ -catenin inhibitor). Scale bar; 200  $\mu$ m.

# Supplementary Fig. 4. Related to Fig. 4

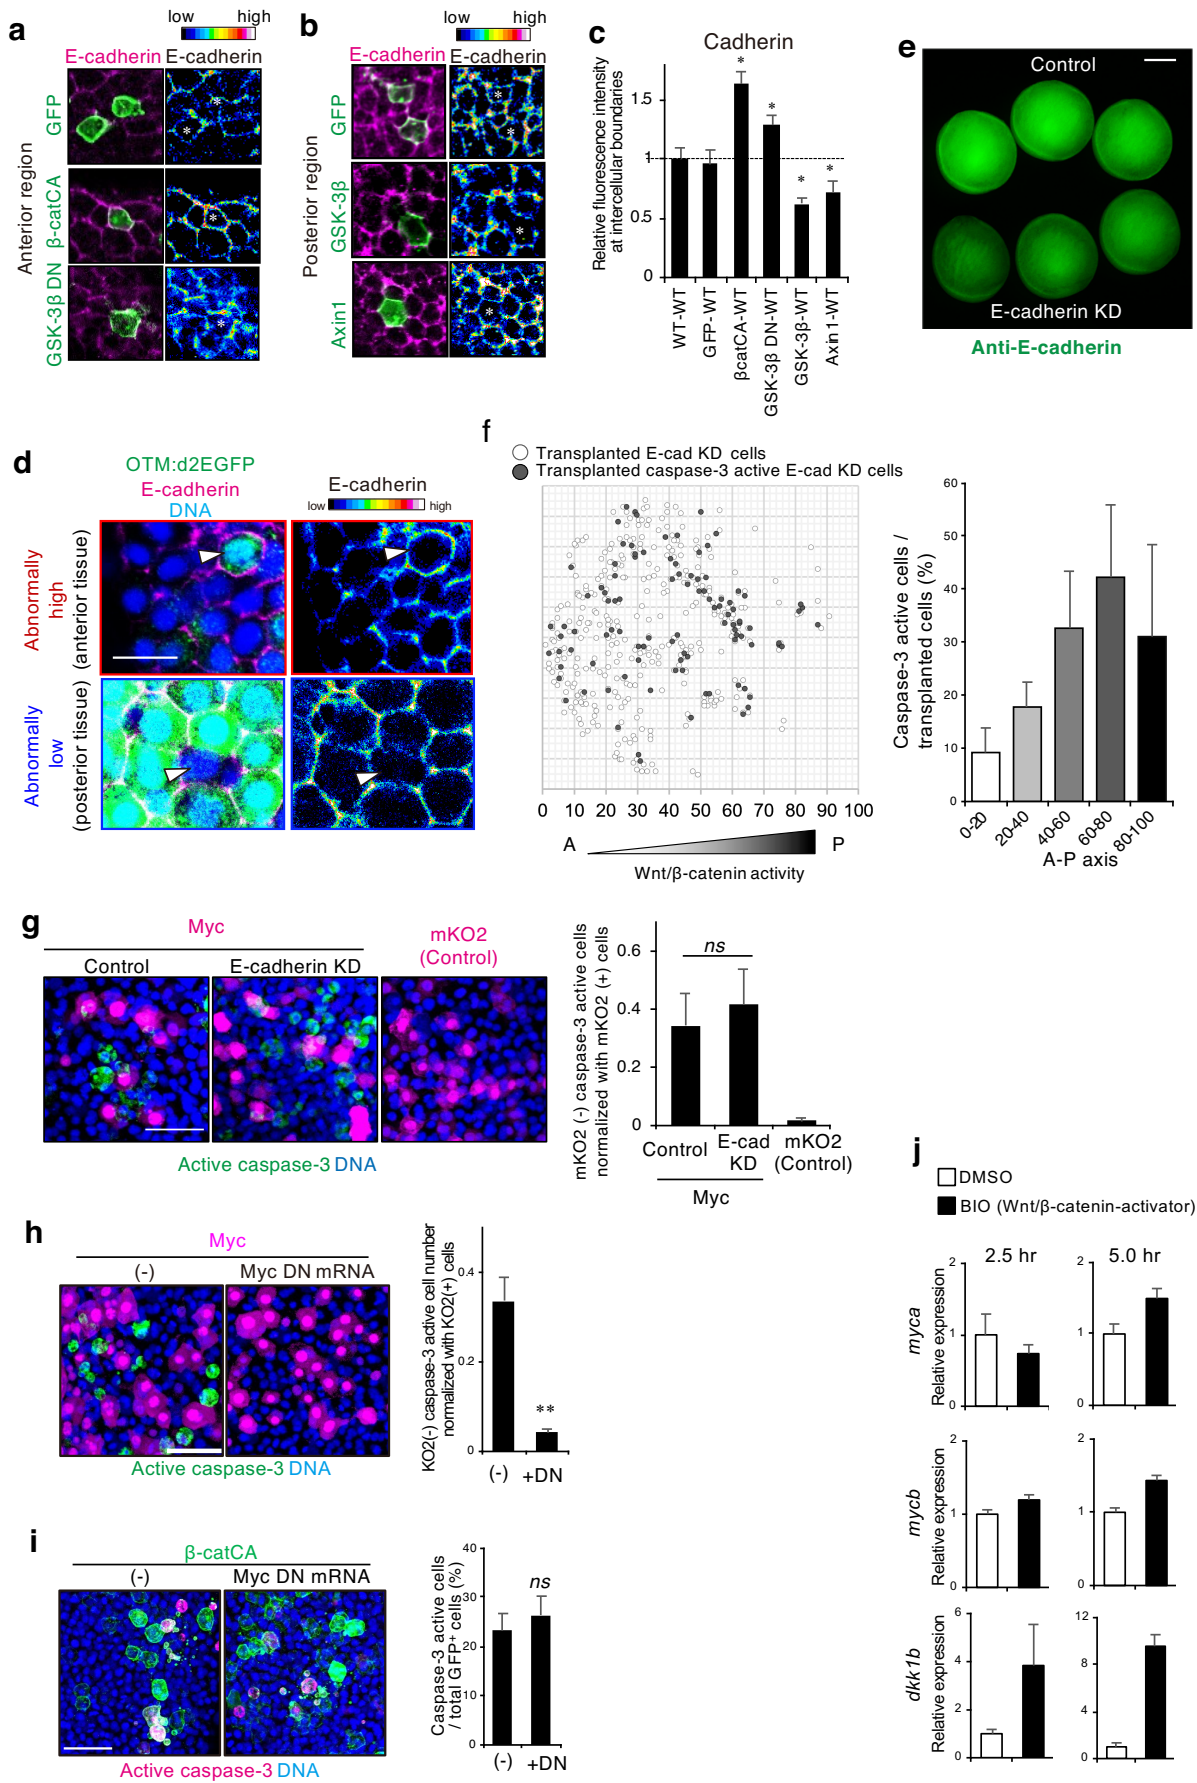



**Supplementary Fig. 4** Cadherin mediates Wnt/ $\beta$ -catenin-unfit cell apoptosis but not Myc-driven cell competition. Related to Fig. 4. **a-c** Mosaic introduction of unfit cells with abnormal Wnt/ $\beta$ -catenin activity changes the levels of endogenous E-cadherin. Membrane GFP-expressing cells (GFP), Wnt/ $\beta$ -catenin-activated cells (cells overexpressing  $\beta$ catCA or GSK3 $\beta$ DN with GFP), or Wnt/ $\beta$ -catenin-inhibited cells (cells overexpressing GSK3 $\beta$  or Axin1 with GFP) were mosaically introduced into zebrafish embryos. Representative confocal fluorescence images in **(a)** and **(b)** show GFP<sup>+</sup> cells and endogenous E-cadherin proteins (magenta and 16 colours of ImageJ) visualized by immunostaining with anti-E-cadherin. The colour bar indicates fluorescence intensity from high (red) to low (blue). Wnt/ $\beta$ -catenin-activation increased E-cadherin levels in the anterior region where endogenous E-cadherin levels are low, whereas Wnt/ $\beta$ -catenin-inhibition reduced E-cadherin levels in the posterior region where endogenous E-cadherin levels are high. **c** Fluorescence intensity (means  $\pm$  SEM, n=6 or more cells) of intercellular E-cadherin staining between GFP<sup>+</sup> cells and neighbouring wild-type cells, normalized to the intercellular fluorescence intensity between wild-type cells in identical each image. Fluorescence intensity in two intercellular areas per cell was measured. \* $p < 0.05$  (one-way ANOVA). **d** Endogenous E-cadherin protein levels change in naturally generated unfit cells with abnormally high or low Wnt/ $\beta$ -catenin activity. Confocal images showing whole-mount immunostaining of E-cadherin (magenta) in OTM:d2EGFP (green) embryos. Right panels show fluorescence intensity. Arrows indicate unfit cells. Scale bar, 50  $\mu$ m. **e** Partial knockdown of E-cadherin (*cdh1*) in zebrafish embryos. Fluorescence image shows anti-E-cadherin immunostaining of embryos injected with 0.3 ng of control MO (upper) or E-cadherin MO (lower). Scale bar, 250  $\mu$ m. E-cadherin MO reduces the fluorescence signal intensity, suggesting that this MO can reduce endogenous E-cadherin levels and that this E-cadherin antibody recognizes endogenous E-cadherin. **f** Cells causing excess noise in cadherin-gradients efficiently undergo apoptosis. Left panel shows the map of transplanted E-cadherin knockdown (E-cad KD) cells in zebrafish embryos. Right graph shows the means  $\pm$  SEM of caspase-3-active cell frequencies within the divided range along the AP axis (n = 8 embryos, 474 cells). **g** High levels of Myc drives cell competition in an E-cadherin-independent manner. Representative confocal fluorescence images show mKO2 (magenta), active caspase-3 (green), and DNA (blue) in 0.3 ng of control MO (control)- or E-cadherin MO-injected (E-cad KD) embryos, which were mosaically introduced with cells overexpressing membrane mKO2 alone (mKO2) or with Myc. Scale bar, 50  $\mu$ m. Means  $\pm$  SEM (n=7 or 8 embryos, two independent experiments) of mKO2-negative caspase-3 active cell numbers normalized with mKO2-positive cells are shown. ns,  $p > 0.05$  (*t* test). **h, i** Dominant negative mutant of Myc (Myc-DN) blocks Myc-driven cell competition (**h**) but not Wnt/ $\beta$ -catenin unfit cell elimination (**i**). Representative confocal images show whole-mount immunostaining of active caspase-3 (green in **h**, magenta in **i**) in mosaic embryos expressing membrane mKO2 with Myc (magenta in **h**) or membrane GFP with  $\beta$ -catCA (green in **i**) and uninjected (-) or injected with Myc-DN mRNA. Scale bar, 50  $\mu$ m. Graphs show the means  $\pm$  SEM (n=5 or more embryos, two independent experiments) of mKO2-negative caspase-3 active cell numbers normalized with mKO2-positive cells (**h**) or of GFP-positive caspase-3 active cell numbers (**i**). \*\* $p < 0.01$ ; ns,  $p > 0.05$  (*t* test). **j** Myc genes (*myca* and *mycb*) are not immediate early genes in Wnt/ $\beta$ -catenin signalling in zebrafish embryos. Embryos were treated with 10  $\mu$ M BIO (Wnt/ $\beta$ -catenin-activator) for 2.5 or 5.0 h and then mRNA expression levels of *myca*, *mycb*, and *dkk1b* (a Wnt/ $\beta$ -catenin target gene) were measured by qRT-PCR.

# Supplementary Fig. 5 Related to Fig. 5

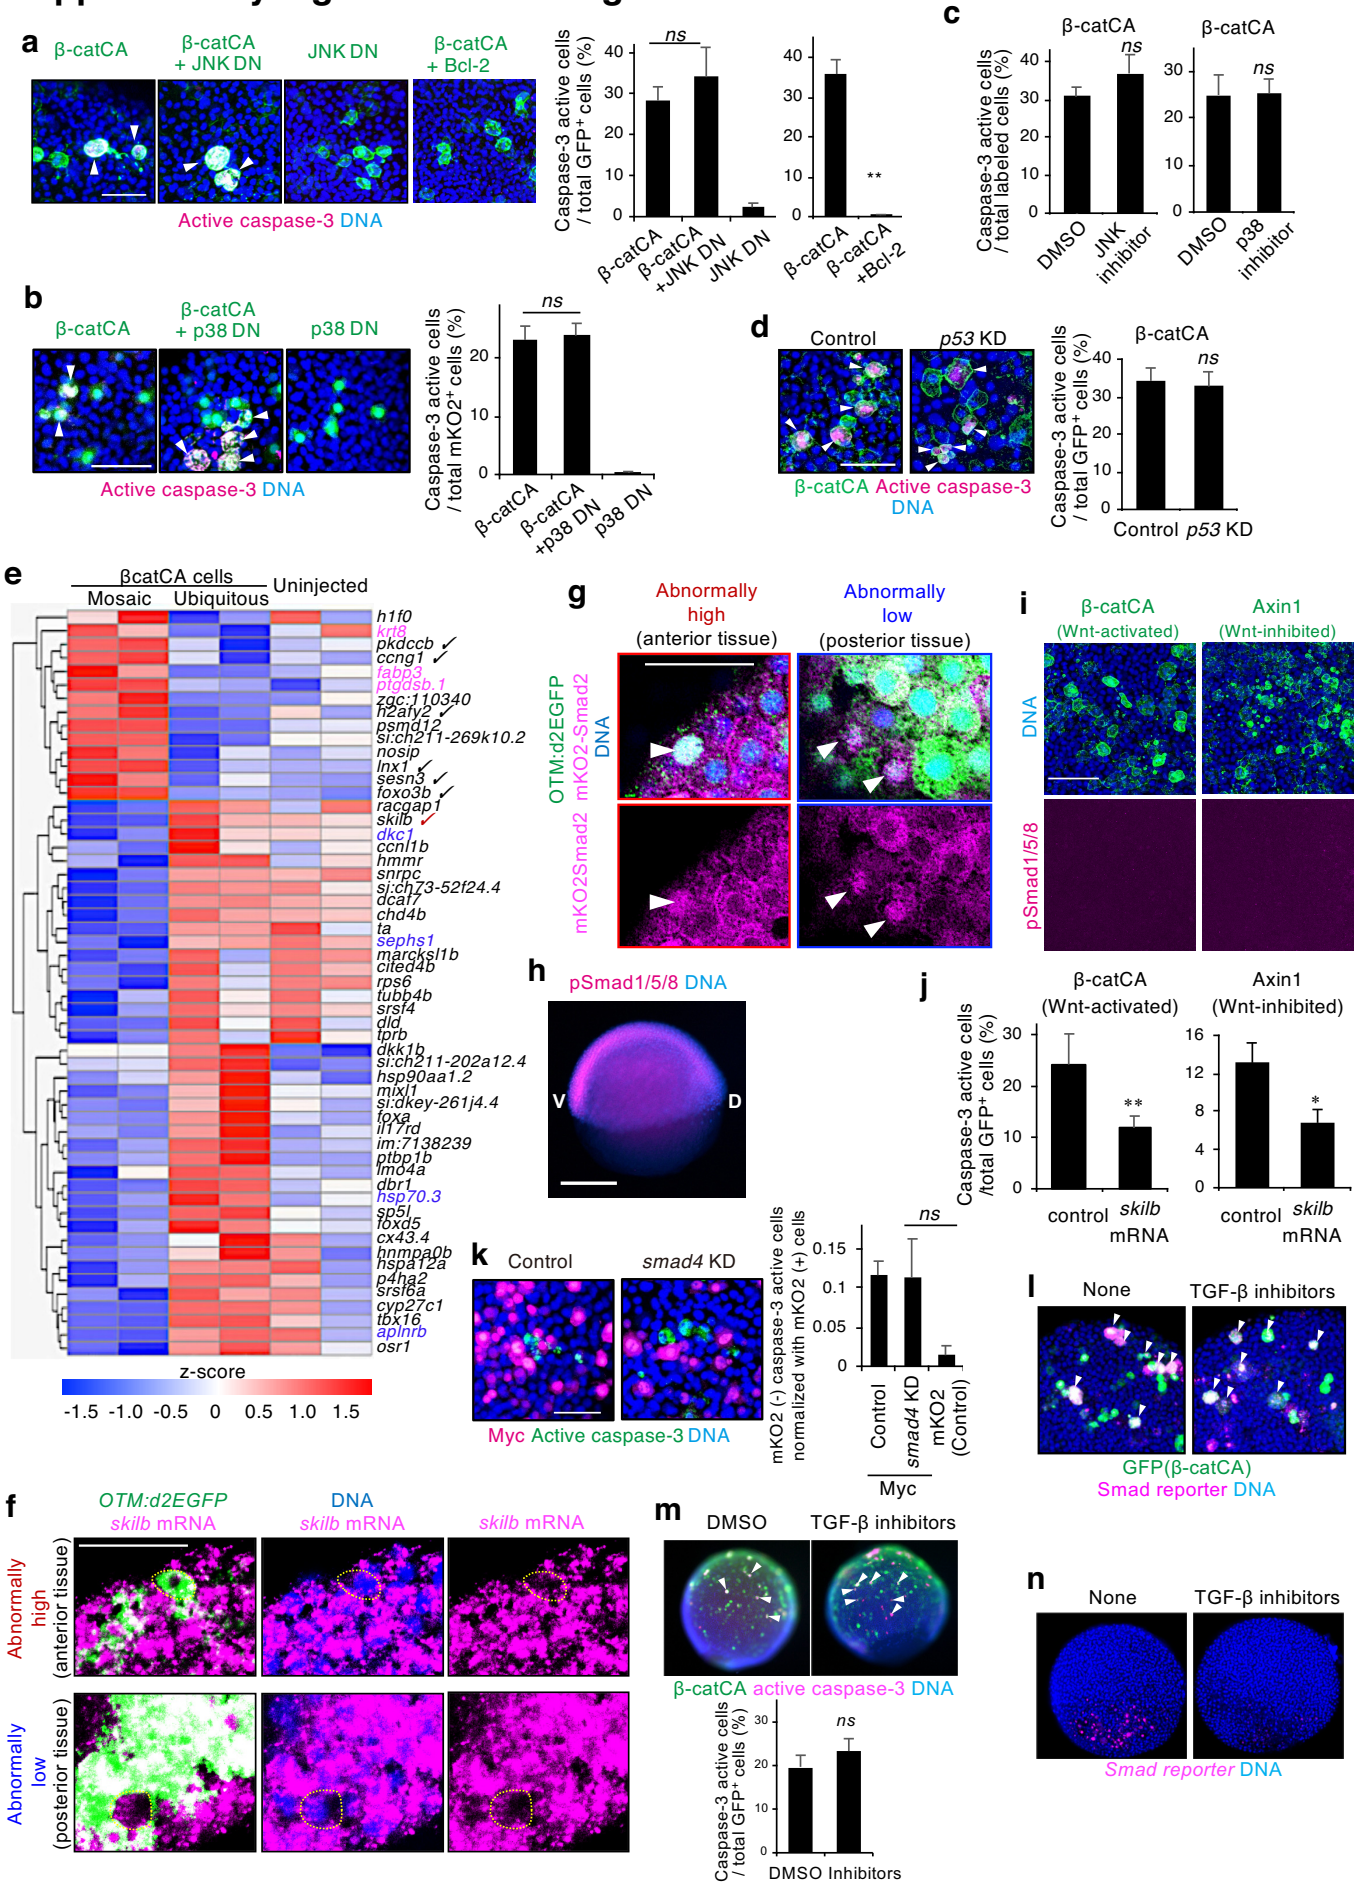

**Supplementary Fig. 5** Exploration of the Wnt/ $\beta$ -catenin-unfit cell-killing system. Related to Fig. 5.

**a** Dominant-negative mutant of JNK (JNK DN) did not block apoptosis of  $\beta$ -catCA-expressing cells. Representative confocal fluorescence images show GFP (green), active caspase-3 (magenta), and DNA (blue) in embryos mosaically introduced with cells expressing membrane GFP with  $\beta$ -catCA and JNK DN, as indicated. Means  $\pm$  SEM (n=4 or more embryos, two independent experiments) of GFP<sup>+</sup> caspase-3 active cell frequencies are shown. Bcl-2 was used as a positive control. Injection of *bcl2* mRNA (200 pg) efficiently blocked induction of Wnt/ $\beta$ -catenin abnormal-cell apoptosis. **b** Dominant-negative mutant of p38 (p38 DN) did not block apoptosis of  $\beta$ -catCA-expressing cells. Representative confocal fluorescence images show mKO2 (green), active caspase-3 (magenta), and DNA (blue) in embryos mosaically introduced with cells expressing membrane mKO2 with  $\beta$ -catCA, JNK DN, and Bcl-2, as indicated. Means  $\pm$  SEM (n=4 or more embryos, two independent experiments) of mKO2<sup>+</sup> caspase-3 active cell frequencies are shown. *ns*,  $p > 0.05$ ;  $**p < 0.01$  (*t* test). **c** Treatment with chemical inhibitors against JNK or p38 did not block apoptosis of  $\beta$ -catCA-expressing cells. Embryos were mosaically introduced with cells expressing membrane GFP with  $\beta$ -catCA in the presence of 0.4% DMSO, JNK inhibitor (SP600125 in DMSO, 10  $\mu$ M), or p38 inhibitor (SB203580 in DMSO, 100  $\mu$ M). Representative confocal fluorescence images show GFP (green), active caspase-3 (magenta), and DNA (blue) in the embryos. Means  $\pm$  SEM (n=4 or more embryos, two independent experiments) of GFP<sup>+</sup> caspase-3 active cell frequencies are shown. Note that treatment with 10  $\mu$ M SP600125 or 100  $\mu$ M SB203580 induced morphological defects related to the loss of JNK or p38<sup>2,3</sup>, respectively (Y.A. unpublished observations), suggesting that SP600125 and SB203580 blocked endogenous JNK and p38 activities, respectively. **d** Knock-down of p53 did not block apoptosis of  $\beta$ -catCA-expressing cells. Representative fluorescence images show GFP (green), active caspase-3 (magenta), and DNA (blue) of control MO- or *p53* MO-injected embryos mosaically introduced with cells expressing both membrane GFP and  $\beta$ -catCA. Means  $\pm$  SEM (n=5 or more embryos, two independent experiments) of GFP<sup>+</sup> ( $\beta$ -catCA) caspase-3 active cell frequencies are shown. **e** Heat map of differentially expressed genes in Mosaic, Ubiquitous, and Uninjected embryos as evaluated by RNA-Seq (n = 2). Check marks: Smad signalling-related genes; Pink and blue genes are positive and negative ROS signalling regulators, respectively. **f, g** Endogenous *skilb* mRNA levels and Smad2 localization change in naturally generated unfit cells with abnormally high or low Wnt/ $\beta$ -catenin activity. Confocal images showing whole-mount fluorescent in situ hybridization of *skilb* mRNA (**f**) and immunostaining of exogenous mKO2-Smad2 (magenta) (**g**) in OTM:d2EGFP (green) embryos. Arrows indicate unfit cells. Scale bar, 50  $\mu$ m. **h, i** BMP-type Smad1/5/8 are not activated in Wnt/ $\beta$ -catenin abnormal cells. As a positive control of immunostaining to phospho-Smad1/5/8, representative fluorescence image shows whole-mount immunostaining of anti-phospho-Smad1/5/8 (magenta) and DNA (blue) in zebrafish early embryo at 6 hpf (shield stage) (lateral view with anterior to the top, ventral to the left). V and D indicate ventral and dorsal. Scale bar, 250  $\mu$ m. **i** Representative confocal fluorescence images show that GFP (green) with  $\beta$ -catCA or Axin1, DNA (blue) and pSmad1/5/8 (magenta). Scale bar, 50  $\mu$ m. **j** Co-expression of *skilb* blocks apoptosis of  $\beta$ -catCA- or Axin1-expressing cells. Uninjected (control) or *skilb* mRNA (800 pg)-injected embryos were mosaically introduced with cells overexpressing membrane GFP with  $\beta$ -catCA or Axin1 and then caspase-3 activation was detected. Graphs show the means  $\pm$  SEM (n=9 or more embryos, two independent experiments) of GFP<sup>+</sup> caspase-3 active cell frequencies.  $**p < 0.01$ ,  $*p < 0.05$  (*t* test). **k, i** Smad4 knock-down does not block Myc-driven cell competition. Representative confocal fluorescence images show mKO2 (magenta), active caspase-3 (green), and DNA (blue) in 10 ng of control MO- or *smad4* MO-injected embryos, which were mosaically introduced with cells overexpressing membrane mKO2 with Myc. Scale bar, 200  $\mu$ m. Graph shows the means  $\pm$  SEM (n=8 embryos, two independent experiments) of mKO2-negative caspase-3 active cell numbers normalized with Myc-expressing cells. **l** treatment with both the TGF- $\beta$  receptor inhibitor LY364947 and the Activin/Nodal receptor inhibitor SB431542 could not block Smad reporter activation in  $\beta$ -catCA-overexpressing cells. Representative confocal fluorescence images show GFP (green) with  $\beta$ -catCA, DNA (blue), and Smad reporter (SBE-luc) activity (magenta) in embryos mosaically introduced with cells

carrying SBE-luc and expressing membrane mKO2 with  $\beta$ -cat CA, either untreated (None) or treated with both LY364947 (100  $\mu$ M) and SB431542 (200  $\mu$ M). **m** Treatment with both LY364947 and SB431542 could not block apoptosis of  $\beta$ -catCA-overexpressing cells. Representative confocal fluorescence images show GFP (green) with  $\beta$ -catCA, DNA (blue), and active caspase-3 (magenta) in embryos mosaically introduced with cells expressing membrane mKO2 with  $\beta$ -cat CA, either untreated (None) or treated with both LY364947 (100  $\mu$ M) and SB431542 (200  $\mu$ M). Graphs show means  $\pm$  SEM (n=6 or more embryos, two independent experiments) of GFP+ caspase-3 active cell frequencies. **n** Treatment with both LY364947 and SB431542 blocked endogenous TGF- $\beta$  signalling-mediated Smad reporter activation at 4 hpf. Representative confocal fluorescence images show DNA (blue) and Smad reporter (SBE-luc) activity (magenta) in 4.3 hpf embryos introduced with SBE-luc, either untreated (None) or treated with both LY364947 (20  $\mu$ M) and SB431542 (50  $\mu$ M). Local activation of SBE-luc was detected in untreated embryos but not in inhibitor-treated embryos. This local activation is likely induced by endogenous TGF- $\beta$  (Nodal) signalling.

## Supplementary Fig. 6 Related to Fig. 6

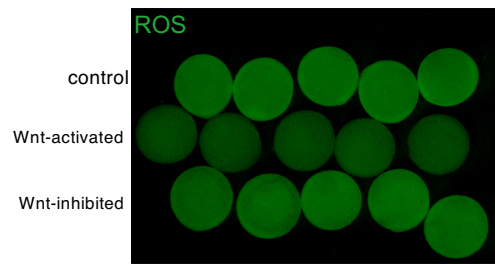

**Supplementary Fig. 6** Ubiquitous Wnt/ $\beta$ -catenin activation or inhibition does not activate ROS production. Related to Fig. 6. Fluorescence images showing ROS probe (CellRox Green)-stained embryos untreated (top) or treated with 10  $\mu$ M BIO (Wnt/ $\beta$ -catenin-activator) (middle) or injected with 800 ng of *dkk1b* mRNA (Wnt/ $\beta$ -catenin-inhibitor) (bottom). Scale bar, 200  $\mu$ m. Note that ubiquitous Wnt/ $\beta$ -catenin activation slightly reduced endogenous ROS.

# Supplementary Fig. 7 Related to Fig. 7

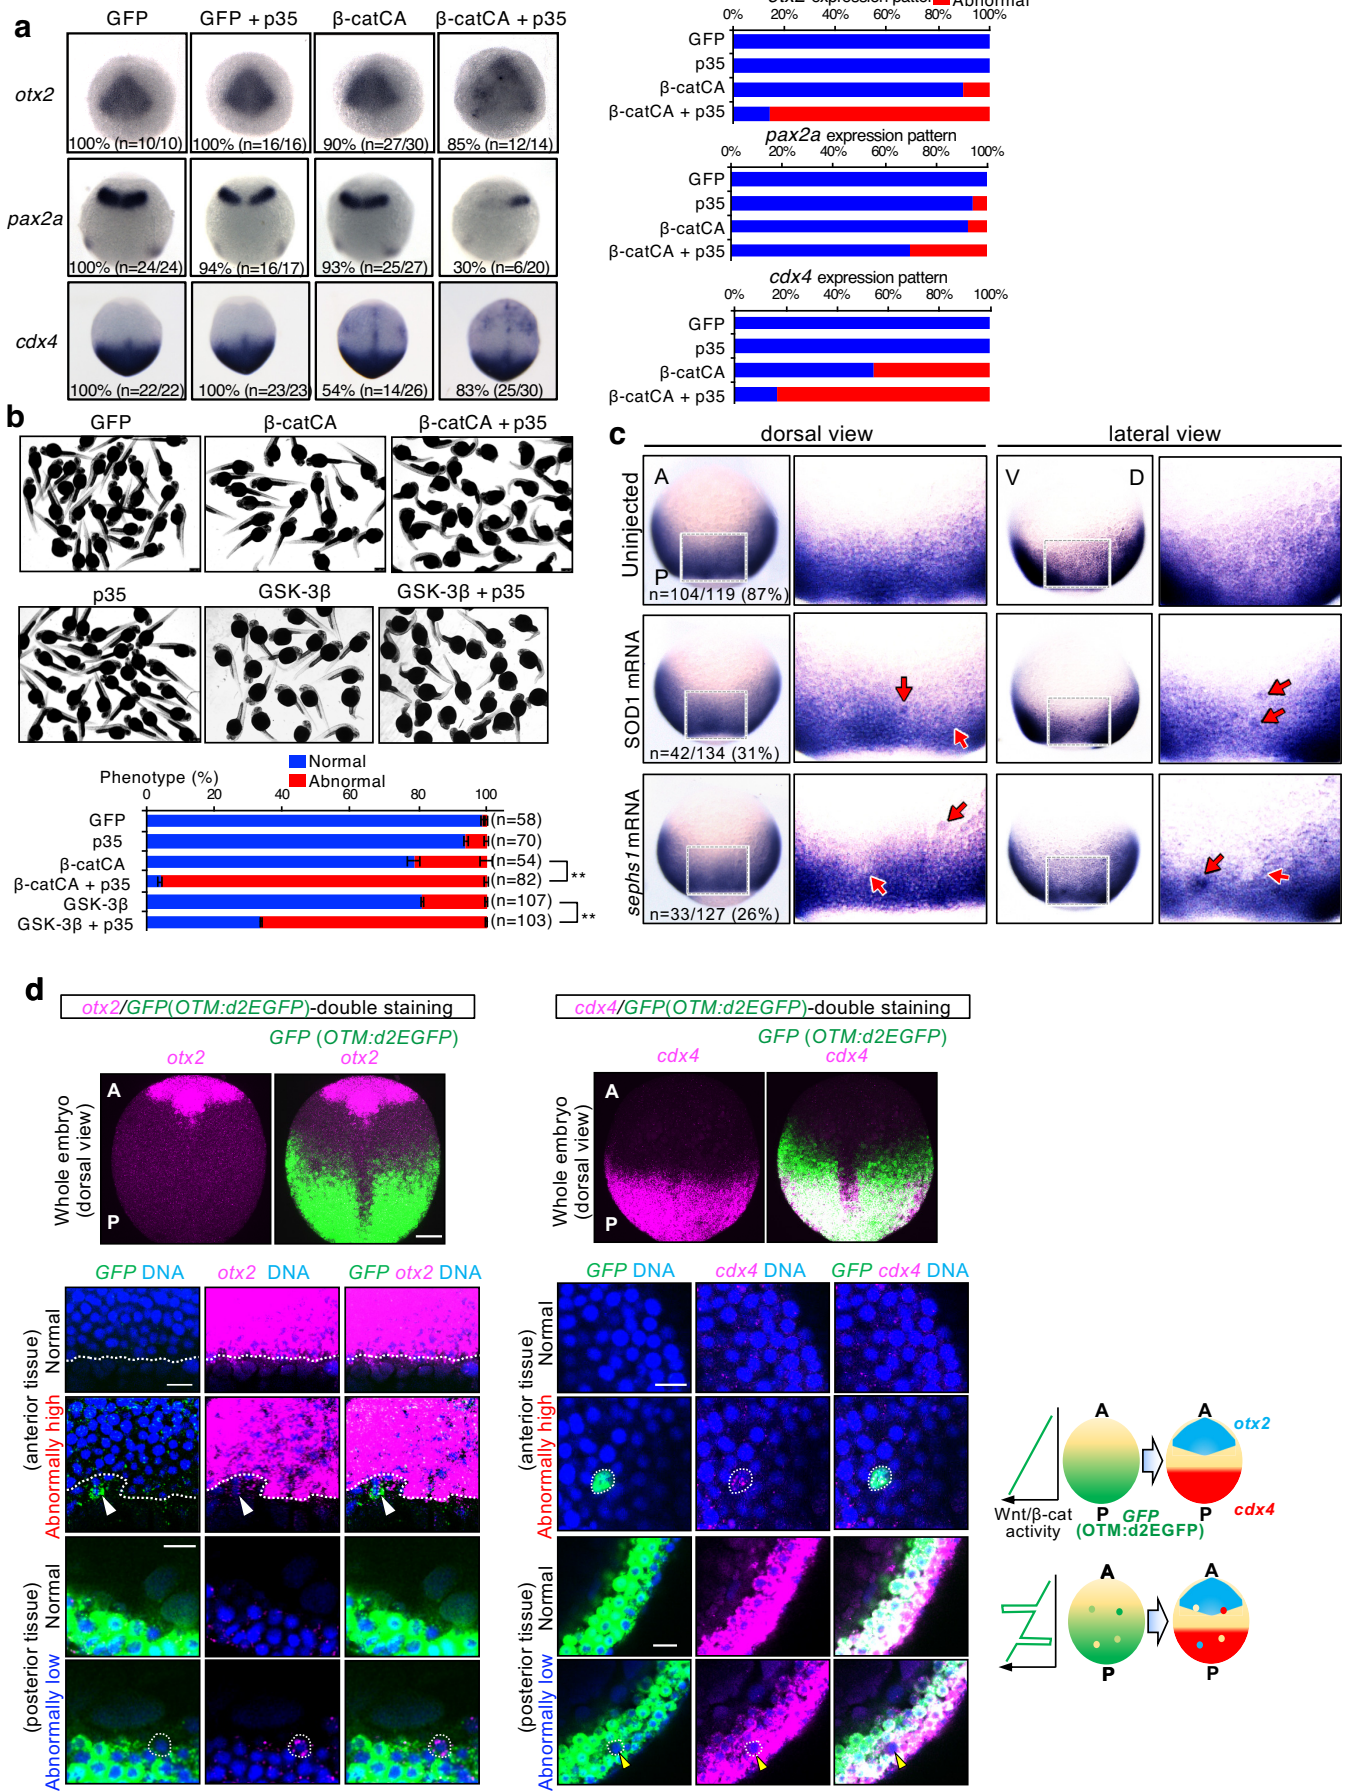

**Supplementary Fig. 7** Apoptotic elimination of unfit cells is required for precise AP patterning and morphogenesis. Related to Fig. 7. **a** Inhibition of apoptosis in  $\beta$ -catCA-overexpressing cells disturbs AP patterning. Images show whole-mount *in situ* hybridization of *otx2* (marker of presumptive forebrain and midbrain), *pax2a* (marker of presumptive midbrain-hindbrain boundary), and *cdx4* (marker of presumptive spinal cord) in embryos mosaically introduced with cells expressing membrane GFP alone (GFP) or with  $\beta$ -catCA with or without p35. Percentages of embryos displaying abnormal expression patterns are shown. p35 co-expression in artificially introduced  $\beta$ -catCA-expressing cells induced ectopic expression of posterior marker *cdx4* in the anterior tissue and perturbed the expression of anterior markers *otx2* and *pax2a*. **b** Inhibition of apoptosis of  $\beta$ -catCA- or GSK-3 $\beta$ -expressing (Wnt-activated or -inhibited) cells disturbs proper morphogenesis. Embryos artificially introduced with cells overexpressing membrane GFP alone (GFP) or with  $\beta$ -catCA or GSK-3 $\beta$  with or without caspase inhibitor p35. Multi-sample images of 32 hpf larvae. Scale bar, 500  $\mu$ m. Embryo percentages with normal or abnormal morphogenesis (right). Total analysed embryo numbers are shown.  $**p < 0.01$  (Fisher's exact test). **c** Inhibiting ROS production distorts the gradient of Wnt/ $\beta$ -catenin-target gene expression. Whole-mount *in situ* hybridization of *lef1* in zebrafish embryos (dorsal and lateral view) injected with SOD1 or *sephs1* mRNA (800  $\mu$ g). Magnification of boxed area (grey line) is also shown. Embryo percentages and numbers with similar expression patterns are shown. Red arrows: ectopic activation or inactivation areas. Scale bar, 200  $\mu$ m. **d** Naturally occurring Wnt-noise cells express improper pattern makers. Panels show confocal images of fluorescent whole-mount *in situ* hybridization with *GFP* (OTM:d2EGFP), *otx2* (marker of presumptive forebrain and midbrain) and *cdx4* (marker of presumptive spinal cord) in embryos. Upper panels of *in situ* hybridization represent overview of whole embryo. Scale bar, 100  $\mu$ m. Lower panels represent magnified view of normal or abnormal Wnt signalling activity areas. Scale bar, 20  $\mu$ m. Naturally occurring unfit cells with abnormally high or low Wnt signalling activity are indicated by arrowheads (white or yellow) or white dotted line circles. Upper schematic illustration indicates expression of *GFP* (OTM:d2EGFP) and pattern of AP tissue markers.



Supplementary Fig. 8

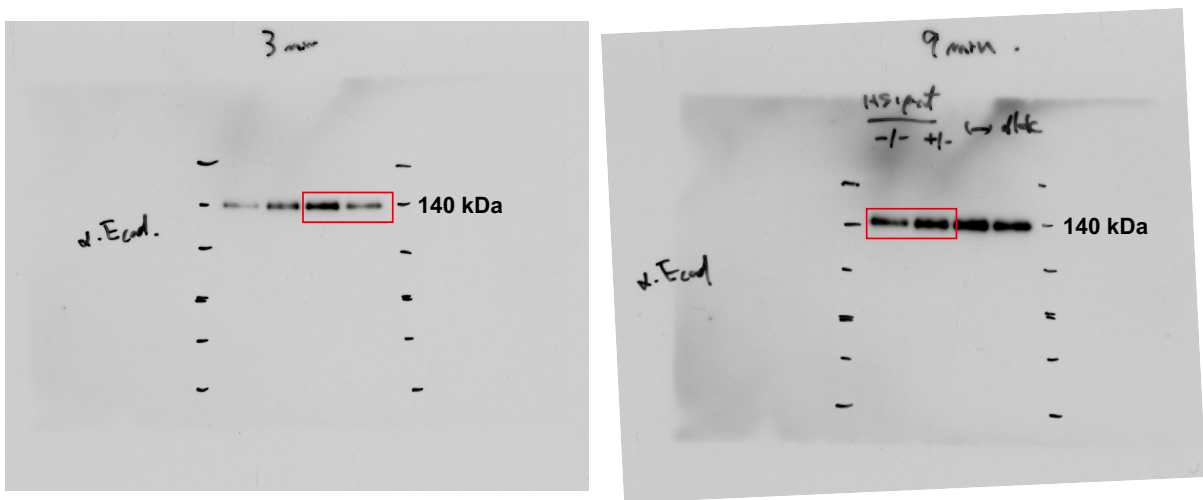

anti-E-cadherin

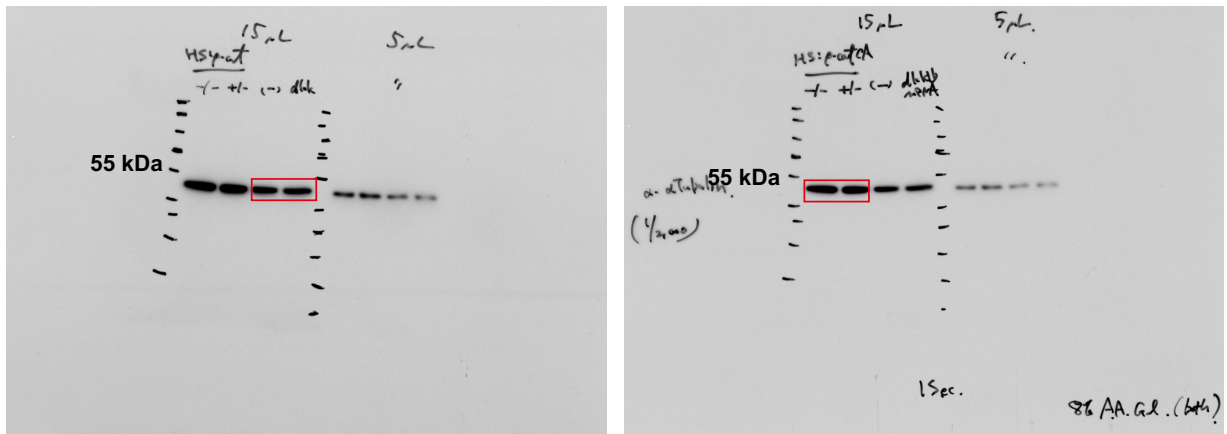

anti- $\alpha$ -tubulin

**Supplementary Fig. 8** Uncropped scans of Western blots in Fig. 3f.

### Supplementary references

1. Asakawa, K. et al. Genetic dissection of neural circuits by Tol2 transposon-mediated *Gal4* gene and enhancer trapping in zebrafish. *Proc. Natl. Acad. Sci. U. S. A.* **105**, 1255–1260 (2008).
2. Hsu, R. J., Lin, C. C., Su, Y. F. & Tsai, H. J. Dickkopf-3-related gene regulates the expression of zebrafish *myf5* gene through phosphorylated p38a-dependent Smad4 activity. *J. Biol. Chem.* **286**, 6855–6864 (2011).
3. Seo, J. et al. Negative regulation of wnt11 expression by Jnk signaling during zebrafish gastrulation. *J. Cell. Biochem.* **110**, 1022–1037 (2010).
